# Supplementary material for: Marine Actinobacteria as a source of compounds for phytopathogen control: An integrative metabolic-profiling / bioactivity and taxonomical approach
Source: PubMed Central journal article supplement (PMC5321270; doi:10.1371/journal.pone.0170148), 2017-02-22

**Table S2: Dereplication data of 36 variables of Strain 208 (Antimarin database)**

| <i>m/z</i> | RT   | Molecular formula                                             | Hits<br>(Number of Hits from Antimarin-Antibase)                                                           | Activity                       |
|------------|------|---------------------------------------------------------------|------------------------------------------------------------------------------------------------------------|--------------------------------|
| 227.2      | 15.5 | C <sub>13</sub> H <sub>10</sub> N <sub>2</sub> O <sub>2</sub> | <b>1-Hydroxy-6-methoxy-phenazine; 6-Methoxy-1-phenazinol</b><br><br>Source: <i>Streptomyces thioluteus</i> |                                |
|            |      |                                                               | 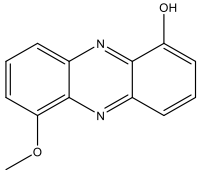                          |                                |
|            |      | C <sub>10</sub> H <sub>14</sub> N <sub>2</sub> O <sub>4</sub> | <b>Nikkomycin D</b><br><br>Source: <i>Streptomyces tendae</i> Tue 901                                      | Peptidyl nucleoside antibiotic |
|            |      |                                                               |                          |                                |
|            |      | C <sub>11</sub> H <sub>14</sub> O <sub>5</sub>                | <b>Xialenone C</b><br><br>Source: <i>Streptomyces</i> sp. GT 061169                                        |                                |
|            |      |                                                               |                         |                                |
|            |      | C <sub>13</sub> H <sub>10</sub> N <sub>2</sub> O <sub>2</sub> | <b>beta-Carboline-3-carboxylic acid methyl ester</b><br><br>Source: <i>Streptomyces</i> sp. Ma5373         |                                |
|            |      |                                                               |                         |                                |
| 245.2      | 35.2 |                                                               | No hits                                                                                                    |                                |
| 245.3      | 43.7 | C <sub>13</sub> H <sub>24</sub> O <sub>4</sub>                | <b>4,5-Dihydro-4-hydroxymethyl-3-(1-hydroxy-6-methylheptyl)-2(3H)-furanone;</b>                            | Antibiotic                     |

ST 43683;2-(6'-Methylheptanol-1'-yl)-3-hydroxymethyl-4-butanolide; Graefe's; Factor I (69.70)

Source: *Streptomyces viridochromogenes*, *S. cyaneofuscatus*, *S. viridochromogenes zimet*, *S. bikiniensis* ja 8031, *S. cyaneofuscatus zimet*

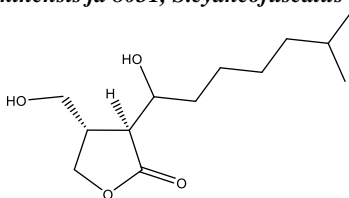

C<sub>12</sub>H<sub>20</sub>O<sub>5</sub>

YF-0200-R-B

Antibiotic

Source: *Streptomyces* sp. YF-0200R

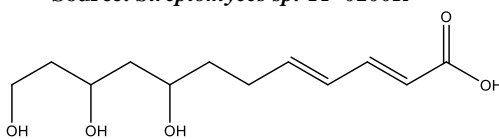

C<sub>13</sub>H<sub>24</sub>O<sub>4</sub>

Graefe's Factor 2

Source: *Streptomyces* sp.

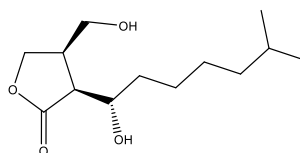

C<sub>13</sub>H<sub>24</sub>O<sub>4</sub>

SCB-1; (2R,3R,1'R)-2-(1'-Hydroxy-6-methylheptyl)-3-hydroxymethylbutanolid

Source: *Streptomyces coelicolor* A3(2)

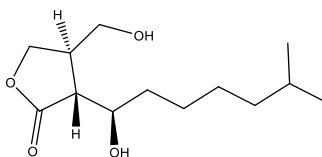

C<sub>13</sub>H<sub>24</sub>O<sub>4</sub>

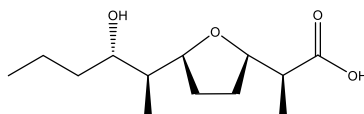

Antibiotic

(71)

Trihomonoactinic acid

Source: *Streptomyces globisporus*

C<sub>11</sub>H<sub>20</sub>N<sub>2</sub>O<sub>4</sub>

Leucyl-4-hydroxyproline

Source : *Streptomyces acrimycini*

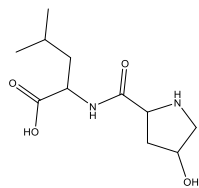

255.2 37.7

No hits

255.3 19.5 C<sub>14</sub>H<sub>10</sub>N<sub>2</sub>O<sub>3</sub>

**N-Acetylquestionin A;** (73,74)  
**2-Acetamido(3H)phenoxazin-3-one**

**Source: *Streptomyces thioluteus*,  
*Microbispora aerate***

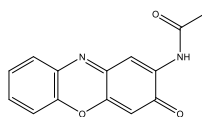

C<sub>15</sub>H<sub>10</sub>O<sub>4</sub>

**Daidzein; Isoaurostatin; K-251b;  
NPI-031E**

**Source: GW82/2497**

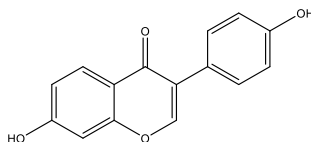

C<sub>15</sub>H<sub>10</sub>O<sub>4</sub>

**Aloesaponarin II**

Antibiotic

**Source: *Streptomyces sp. GW 24/1694*, L083**

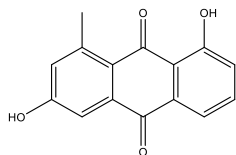

C<sub>14</sub>H<sub>10</sub>N<sub>2</sub>O<sub>3</sub>

**1-Hydroxymethyl-6-carboxyphenazine**

Antibiotic

**Source: *Streptomyces griseoluteus*; marine  
*Vibrio sp. SANK 73794***

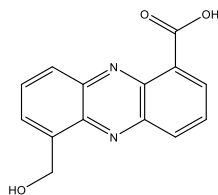

273.3

7.33

C<sub>13</sub>H<sub>8</sub>N<sub>2</sub>O<sub>5</sub>

**2,3,9-Trihydroxyphenazine-1-carboxylic acid**

Source: *Pseudomonas fluorescens*

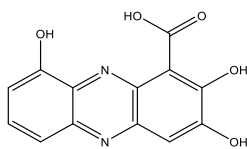

C<sub>14</sub>H<sub>8</sub>O<sub>6</sub>

**Aplidioxin B**

Source: *Aplidiopsis ocellata*

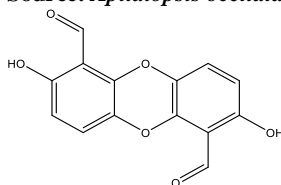

288.3

39.2

C<sub>10</sub>H<sub>13</sub>N<sub>3</sub>O<sub>7</sub>

**Nikkomycin Cx**

Antibiotic

Source: *Streptomyces tendae* Tue 901 (ATCC 31160, Cbs 354.75, FERM-p 3136)

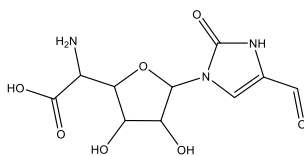

C<sub>10</sub>H<sub>13</sub>N<sub>3</sub>O<sub>7</sub>

**Nikkomycin C; Nikkomycin Cz**

Source: *Streptomyces tendae* Tue 901 (ATCC 31160, Cbs 354.75, FERM-p 3136)

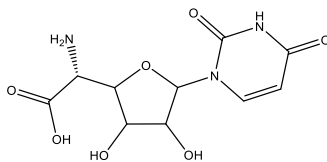

300.1

37.5

**No hits**

337.2

6.4

**No hits**

337.4

42.2

C<sub>19</sub>H<sub>12</sub>O<sub>6</sub>

**WS 5995-A**

Antibiotic

Source: *Streptomyces auranticolor* 5995 (FERM-p 5365)

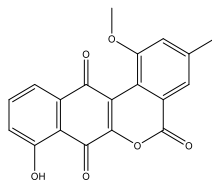

C<sub>19</sub>H<sub>12</sub>O<sub>6</sub>

**Tetracenomycin D1; 9-Decarboxy-tetracenomycin-F1**

Cytotoxic

Source: *Streptomyces glaucescens* Tue 49 (eth 22794); marine *Streptomyces* B-8005

Anticancer

Antibiotic

Antibacterial

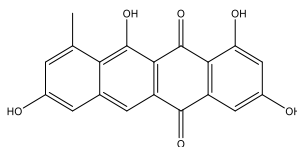

C<sub>20</sub>H<sub>16</sub>O<sub>5</sub> **Fujianmycin B; Rubiginone A2; SNA-8073-A**

Antibiotic and antibacterial compound

Source: *Streptomyces* sp.

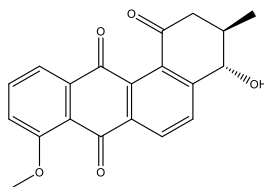

C<sub>20</sub>H<sub>16</sub>O<sub>5</sub> **6-Deoxy-8-O-methylrubelomycin; MM 47755; 8-O-Methyltetrangomycin**

Antibiotic agent. Shows antibacterial and antifungal effects

Source: *Streptomyces* sp. GW11/3289

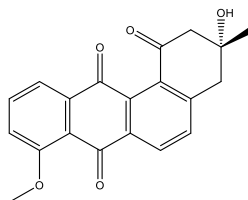

C<sub>20</sub>H<sub>16</sub>O<sub>5</sub> **Hatomarubigin-A; CE-33-A**

Antibiotic

Source: *Streptomyces* sp. 2238-svt4 (FERM bp-3326)

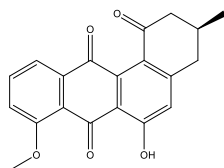

C<sub>20</sub>H<sub>16</sub>O<sub>5</sub> **Hatomarubigin-B; CE-33-B**

Antibiotic

Source: *Streptomyces* sp. 2238-svt4

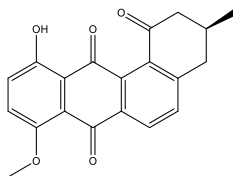

C<sub>20</sub>H<sub>16</sub>O<sub>5</sub>

**SNA-8073-B**

Antibiotic

Source *Streptomyces* sp. *SNA-8073*

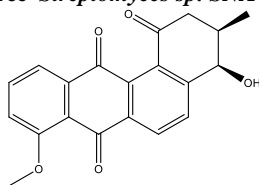

C<sub>19</sub>H<sub>12</sub>O<sub>6</sub>

**6,9,11-Trihydroxy-4-methoxy-5,12-naphthacendione**

Source: *Streptomyces* sp. *GW37/3236*

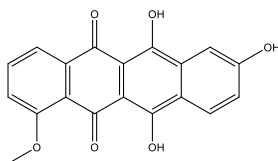

339.3

15.7

C<sub>19</sub>H<sub>14</sub>O<sub>6</sub>

**WS 5995B**

Antibiotic

Source: *Streptomyces auranticolor* 5995 (*FERM-p* 5365), *Streptomyces* sp. *AcH*

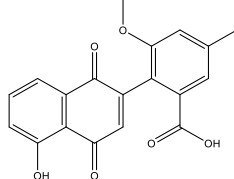

Inhibits colonisation by the root and butt rot fungus *Heterobasidium annosum* 005

Inhibits Norway spruce root infection

C<sub>19</sub>H<sub>14</sub>O<sub>6</sub>

**Rabelomycin; Fridamycin C**

Antibiotic

Source: *S. tsusimaensis*, *S. olivaceus*, marine

*Streptomyces* spp. *B* 6921, *B*6935, *B*6728

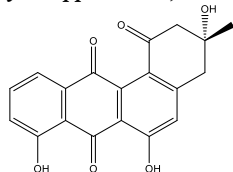

C<sub>19</sub>H<sub>14</sub>O<sub>6</sub>

**Landomycinone A**

Antibiotic

Source: *Streptomyces* sp

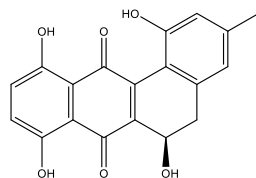

C<sub>19</sub>H<sub>14</sub>O<sub>6</sub>

**Lagumycin A**

Source: marine *Streptomyces* sp. B 8245

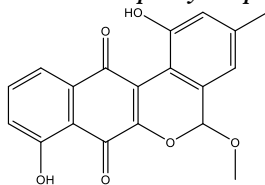

359.3

32.2

C<sub>13</sub>H<sub>14</sub>N<sub>2</sub>O<sub>10</sub>

**Octosyl acid-A**

Source: *Streptomyces cacaoiasoensis*

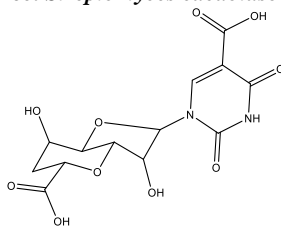

C<sub>19</sub>H<sub>18</sub>O<sub>7</sub>

**2-Deoxy-5,6-dihydro-PD-116198**

Source : *Streptomyces phaeochromogenes*  
WP 3688

Antibiotic

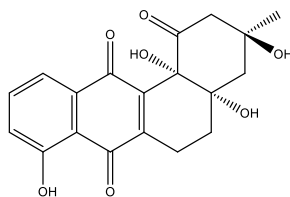

C<sub>19</sub>H<sub>18</sub>O<sub>7</sub>

**Spectomycin-A2**

Antibiotic

Source: *Streptomyces spectabilis*

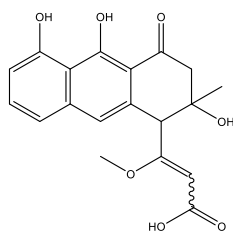

C<sub>19</sub>H<sub>18</sub>O<sub>7</sub>

**Elmycin-C**

Antibiotic

Source: *Streptomyces* sp.

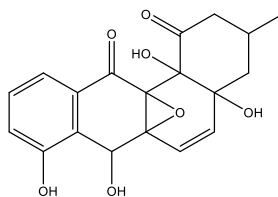

C<sub>19</sub>H<sub>18</sub>O<sub>7</sub>

**Simocyclinon A1**

Antibacterial  
and antitumor  
properties

Source: *Streptomyces sp. Tue 6040*

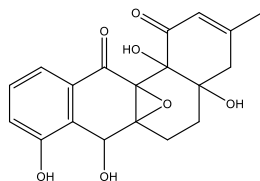

C<sub>19</sub>H<sub>18</sub>O<sub>7</sub>

**4,4a,8,9,10,12b-Hexahydro-4a,7,8,12,113a,-  
pentahydroxy--3-methylbenz[a]anthracene-  
1,11-dione**

Source: *Streptomyces sp. 1B1*

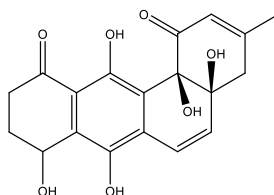

C<sub>19</sub>H<sub>18</sub>O<sub>7</sub>

**Panglimycin D**

Source: *Streptomyces sp. ICBB8230*

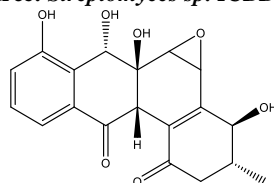

|       |      |         |
|-------|------|---------|
| 381.1 | 36.4 | No hits |
| 383.0 | 37.4 | No hits |
| 392.1 | 37.0 | No hits |
| 395.2 | 37.2 | No hits |
| 423.2 | 35.3 | No hits |
| 425.1 | 40.5 | No hits |
| 453.0 | 15.7 | No hits |
| 455.1 | 31.2 | No hits |
| 457.2 | 9.3  | No hits |
| 464.0 | 37.2 | No hits |
| 475.0 | 11.9 | No hits |



|       |      |         |
|-------|------|---------|
| 482.3 | 5.6  | No hits |
| 484.0 | 37.5 | No hits |
| 494.1 | 31.7 | No hits |
| 495.1 | 37.0 | No hits |
| 500.1 | 36.8 | No hits |
| 505.0 | 35.0 | No hits |
| 516.2 | 39.5 | No hits |
| 526.1 | 36.5 | No hits |
| 563.3 | 8.4  | No hits |
| 639.1 | 40.5 | No hits |
| 684.7 | 43.4 | No hits |
| 714.3 | 40.0 | No hits |
| 775.3 | 44.4 | No hits |

262.4 30.7 C<sub>16</sub>H<sub>23</sub>NO<sub>2</sub>

**Name: Trichostatinol**

**Source: *Streptomyces* sp. GW37/655**

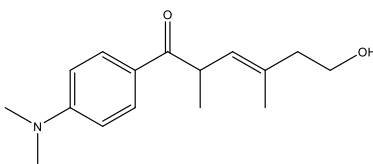

540.5 9.2 C<sub>30</sub>H<sub>21</sub>NO<sub>9</sub>

**Name: Fredericamycin-A; FCRC-A-48;  
FCRC-A-48-A; NSC-305263**

Antibiotic

(72)

**Source: *Streptomyces griseus* (ferc-48)**

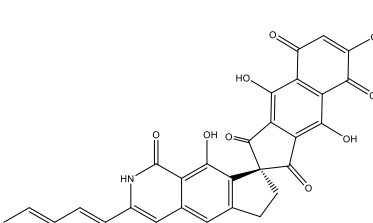

415.5 37.1 C<sub>21</sub>H<sub>38</sub>N<sub>2</sub>O<sub>6</sub>

**Name: NK-04000Q; Epopromycin B**

Source: *Streptomyces* sp. NK04000

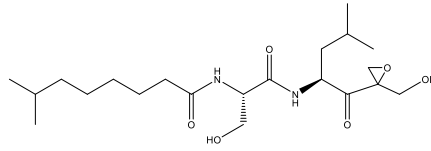

$C_{22}H_{38}O_7$

Name: Feigrisolide D

Macrolide

Source: *Streptomyces griseus*

(75)

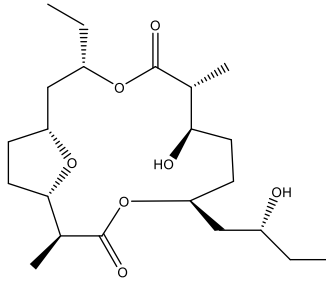

446.6

40.9

$C_{26}H_{39}NO_5$

Name: Piericidin-C2; Piericidin-F

Anthelmintic activity

Source: *Streptomyces piericidicus*, *S. pactum*

(67,68)

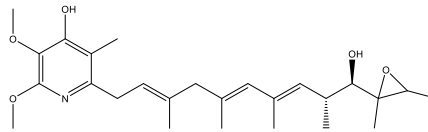

Supplement: pone.0170148.s008.pdf [file pone.0170148.s008.pdf]
