# Supplementary material for: Marine Actinobacteria as a source of compounds for phytopathogen control: An integrative metabolic-profiling / bioactivity and taxonomical approach
Source: PubMed Central journal article supplement (PMC5321270; doi:10.1371/journal.pone.0170148), 2017-02-22
Supplement: pone.0170148.s007.pdf [file pone.0170148.s007.pdf]

**Table S1: Biochemical test for 24 marine strains. API 20E Test (bioMérieux Inc., Durham, NC) – Oxidase and Catalase – L,L DAP (*Actinobacteria*).** The test shows the presence of: **ONPG:**  $\beta$ -galactosidase; **ADH:** arginine-dihydrolase; **LDC:** lysine decarboxylase; **ODC:** ornithine decarboxylase. **CIT:** citrate utilization. Production of: **H<sub>2</sub>S,** **URE:** Urease, **TDA:** tryptophan deaminase, **IND:** indole, **VP:** acetoin, **GEL:** gelatinase. Other biochemical characteristics such as fermentation or oxidation of sugars (**GLU:** glucose, **MAN:** manitol, **INO:** inositol, **SOR:** sorbitol, **RHA:** rhamnose, **SAC:** sucrose, **MEL:** melibiose, **AMY:** amygdalin and **ARA:** arabinose. It also shows the reduction of nitrates to nitrites.

| TEST/<br>Strain | ONPG | ADH | LDC | ODC | CIT | H <sub>2</sub> S | URE | TDA | IND | VP | GEL | GLU | MAN | INO | SOR | RHA | SAC | MEL | AMY | ARA | NO <sub>2</sub> | oxidase | catalase | L,L DAP |
|-----------------|------|-----|-----|-----|-----|------------------|-----|-----|-----|----|-----|-----|-----|-----|-----|-----|-----|-----|-----|-----|-----------------|---------|----------|---------|
| 143             | +    | +   | +   | -   | -   | -                | +   | +   | -   | +  | +   | -   | -   | -   | -   | -   | -   | -   | -   | +   | -               | +       | +        | +       |
| 144             | +    | +   | -   | -   | -   | -                | -   | +   | -   | +  | +   | -   | -   | -   | -   | -   | -   | -   | -   | +   | -               | +       | +        | +       |
| 161A            | +    | +   | -   | -   | +   | -                | +   | +   | -   | +  | +   | -   | -   | -   | -   | -   | -   | -   | -   | +   | +               | -       | +        | +       |
| 161B            | +    | -   | -   | +   | +   | -                | +   | +   | -   | -  | +   | -   | +   | -   | -   | -   | -   | -   | -   | -   | -               | -       | -        | +       |
| 25              | +    | -   | -   | -   | -   | -                | +   | +   | -   | +  | +   | -   | +   | +   | -   | -   | -   | +   | -   | +   | +               | -       | +        | -       |
| 184             | +    | -   | -   | -   | -   | -                | +   | +   | -   | -  | +   | +   | -   | -   | -   | -   | -   | -   | -   | -   | -               | -       | +        | +       |
| 208             | +    | -   | -   | +   | -   | -                | +   | +   | -   | +  | +   | -   | -   | -   | -   | -   | -   | -   | -   | +   | -               | -       | +        | +       |
| 102N            | -    | +   | +   | -   | -   | +                | -   | +   | -   | +  | +   | +   | -   | -   | -   | -   | +   | +   | +   | +   | +               | -       | +        | -       |
| 13              | -    | +   | -   | -   | -   | -                | +   | +   | -   | +  | +   | +   | +   | -   | -   | -   | -   | -   | -   | +   | -               | -       | +        | +       |
| 144A            | -    | +   | -   | -   | -   | -                | -   | +   | -   | +  | +   | -   | -   | -   | -   | -   | +   | -   | -   | -   | -               | +       | +        | +       |

|      |   |   |   |   |   |   |   |   |   |   |   |   |   |   |   |   |   |   |   |   |   |   |   |   |
|------|---|---|---|---|---|---|---|---|---|---|---|---|---|---|---|---|---|---|---|---|---|---|---|---|
| 148  | - | + | - | + | - | - | - | + | - | - | + | + | - | - | - | - | - | - | + | + | - | + | + |   |
| 149  | - | + | - | - | - | - | - | + | - | + | + | - | - | - | - | - | + | - | - | + | + | + | + | + |
| 149A | - | + | - | - | + | - | - | + | - | + | + | + | - | - | - | - | + | + | - | + | - | + | + | + |
| 87   | - | - | + | - | + | - | - | + | - | + | + | - | + | - | - | - | - | - | + | - | - | + | + | + |
| 89.3 | - | - | + | - | + | - | - | + | - | + | + | + | + | + | + | + | + | - | + | + | + | + | + | + |
| 89.4 | - | - | + | - | + | - | - | + | - | + | + | + | + | + | + | + | + | - | + | + | - | + | + | + |
| 6    | - | - | - | - | - | - | + | + | - | + | + | + | + | - | - | - | - | - | + | + | - | - | + | + |
| 46b  | - | - | - | - | - | - | + | - | + | + | + | + | + | + | + | + | + | - | + | + | - | + | + | + |
| 194  | - | - | - | - | - | - | - | + | - | - | + | + | - | - | - | - | - | + | - | + | + | - | + | + |
| 3    | - | - | - | - | - | - | - | + | + | + | + | + | - | + | + | + | - | + | - | + | - | - | + | + |
| 182  | - | - | - | - | - | - | - | + | - | + | + | - | - | - | - | - | - | + | - | + | - | - | + | + |
| 145  | - | - | - | - | - | - | - | + | - | + | + | - | - | - | - | - | - | - | - | + | - | + | + | + |
| 5    | - | - | - | - | - | - | - | + | - | + | + | + | + | + | + | + | - | + | - | + | - | + | + | + |
| 9    | - | - | - | - | - | - | - | + | - | + | + | + | + | + | + | + | - | + | - | + | - | + | + | + |
